# Supplementary material for: Genetic Analysis in African American Children Supports Ancestry-Specific Neuroblastoma Susceptibility
Source: Oxford University Press journal article supplement (doi:10.1158/1055-9965.epi-21-0782), 2022-02-07
Supplement: epi-21-0782_supplementary_tables_s1-s5_supp5.xlsx [file epi-21-0782_supplementary_tables_s1-s5_supp5.xlsx]

## Sheet: Table index
	Table S1.	Several demographic and clinical features are reported here for the AA cohorts according to risk group, namely:
		age, sex, inss stage, mycn status, and ploidy
	Table S2.	SNPs that pass the suggestive significance threshold of association (1E-5) in the AA GWAS are shown; p-value and effect of the association are reported
		for both AA and EA1 GWAS. The effect of association is referred to the A1 allele. It is also reported if the SNP resides within a gene. Cytogenetic bands are also shown
	Table S3.	This table shows SNPs that pass the nominal significance threshold of association (0.05) in the AA GWAS and lie within the kown neuroblastoma loci described in the text (+- 1KB from SNP reported in the original study) and have the same direction of effect in EA1 GWAS;
		p-value and effect of the association are reported for both AA and EA1 GWAS. The effect of association is referred to the A1 allele. It is also reported if the SNP resides within a gene. Cytogenetic bands are also shown
	Table S4.	SNPs that pass the suggestive significance threshold of association (1E-5) in the AA high-risk GWAS are shown; p-value and effect of the association are reported
		for both AA and EA1 high-risk GWAS. The effect of association is referred to the A1 allele. It is also reported if the SNP resides within a gene. Cytogenetic bands are also shown
	Table S5.	Set of independent SNPs (r2 < 0.1) included in the best-fit PRS in AA with association p-value from EA1

## Sheet: Table S1
Table S1
	risk:	high	intermediate	low	unknown	total
	N	254	104	139	132	629
	AGE
	mean (std)	1542 (1249)	397 (411)	904 (1072)	1065 (1323)	1121 (1175)
	range	53-7569	1-2376	1-5873	11-6491	1-7569
	SEX
	Male	148	48	62	13	271
	Female	106	56	77	12	251
	Unknown	0	0	0	107	107
	INSS STAGE
	Stage 1	0	0	81	0	81
	Stage 2a	0	5	23	1	29
	Stage 2b	1	13	25	1	40
	Stage 3	32	47	0	10	89
	Stage 4	218	25	0	2	245
	Stage 4s	3	14	9	3	29
	Unknown	0	0	1	115	116
	MYCN
	Amplified	73	0	1	0	74
	Not amplified	156	104	137	12	409
	Unknown	25	0	1	120	146
	PLOIDY
	Diploid	92	22	31	3	148
	Hyperdiploid	109	77	103	5	294
	Hypodiploid	0	0	0	1	1
	Unknown	53	5	5	123	186

## Sheet: Table S2
Table S2
	CHR	POS	SNP	A1	A2	AA_EFF	AA_P	EA1_EFF	EA1_P	GENES	BAND
	10	45310264	rs114177242	C	T	0.7973	3.255e-06	NA	NA	TMEM72-AS1	10q11.21
	10	45313464	rs114655292	G	C	1.2736	4.372e-08	NA	NA	TMEM72-AS1	10q11.21
	10	45315503	rs79319483	G	A	0.8288	2.461e-06	NA	NA	TMEM72-AS1	10q11.21
	10	45316986	rs116331909	C	G	1.2732	4.368e-08	NA	NA	TMEM72-AS1	10q11.21
	11	102382976	rs11225292	C	A	0.3071	9.862e-06	-0.0071061	0.89082		11q22.2
	13	47841000	rs7994542	T	C	0.321	6.774e-07	0.023934	0.67139		13q14.2
	14	24876237	rs11626929	C	T	0.4291	9.511e-06	-0.032782	0.41737	NYNRIN	14q12
	16	83853909	rs60724844	G	C	1.0992	4.5e-06	NA	NA		16q23.3
	2	9420132	rs7567672	G	A	0.3226	9.428e-06	-0.060289	0.18416	ASAP2	2p25.1
	2	11720886	rs76718398	A	G	1.1322	9.946e-06	NA	NA	GREB1	2p25.1
	2	21535683	rs116282734	C	G	0.9857	9.621e-07	NA	NA		2p24.1
	2	57959551	rs6756120	G	A	0.5087	8.594e-06	0.47218	0.55815		2p16.1
	2	57960574	rs73941653	A	G	0.519	5.934e-06	0.47218	0.55815		2p16.1
	2	57965893	rs718725	T	C	0.5155	6.212e-06	0.46006	0.57007		2p16.1
	2	57973586	rs7583834	G	A	0.5219	5.87e-06	0.39732	0.62899		2p16.1
	2	57976554	rs73941688	G	A	0.521	6.095e-06	0.39146	0.63446		2p16.1
	2	57999046	rs13422563	C	T	0.5265	5.605e-06	0.95579	0.31564		2p16.1
	2	58005095	rs73941695	G	A	0.5265	5.605e-06	1.0551	0.26441		2p16.1
	2	58014912	rs13391018	C	T	0.5271	5.53e-06	1.0756	0.25983		2p16.1
	2	58024902	rs10153637	A	C	0.5476	8.037e-06	0.85998	0.5956		2p16.1
	2	58041262	rs73944114	G	A	0.5378	4.493e-06	0.69213	0.39834		2p16.1
	2	58084129	rs10205616	T	C	0.5417	7.525e-06	0.75843	0.42455		2p16.1
	2	136999531	rs12105717	G	A	0.4106	3.262e-06	-0.028506	0.65646		2q22.1
	2	137000552	rs59071302	C	T	0.4106	3.262e-06	-0.029643	0.64311		2q22.1
	2	215640396	rs7593780	T	C	0.3	4.673e-06	0.23673	1.4137e-08	BARD1	2q35
	2	215643483	rs4672729	A	G	0.3034	3.502e-06	0.23689	1.3775e-08	BARD1	2q35
	2	215653887	rs7587476	T	C	0.3262	7.646e-07	0.28645	1.5571e-10	BARD1	2q35
	2	215655287	rs10177334	C	T	0.2865	7.66e-06	0.23539	1.8028e-08	BARD1	2q35
	2	215657560	rs1542173	C	T	0.304	7.93e-06	0.28815	1.6194e-10	BARD1	2q35
	2	215658847	rs2734675	T	C	0.3116	6.231e-06	0.28108	5.3085e-10	BARD1	2q35
	2	215658895	rs2734674	A	G	0.309	8.963e-06	0.2841	3.4879e-10	BARD1	2q35
	2	215673739	rs17489231	T	G	0.3716	5.145e-07	0.24418	1.1122e-08	BARD1	2q35
	2	215673937	rs13021937	C	T	0.3716	5.145e-07	0.2446	1.0666e-08	BARD1	2q35
	2	215674090	rs35933323	T	G	0.3716	5.145e-07	0.24485	1.0352e-08	BARD1	2q35
	2	215674323	rs1129804	C	G	0.3716	5.145e-07	0.24517	9.8617e-09	BARD1	2q35
	2	215674341	rs17489363	A	G	0.3716	5.145e-07	0.24514	9.8945e-09	BARD1	2q35
	20	22519425	rs77873597	C	T	0.767	2.421e-06	-0.48867	0.65527		20p11.21
	20	22529193	rs77433741	A	C	0.5406	3.887e-06	0.12022	0.84161		20p11.21
	20	22532776	rs60431508	A	C	0.5764	1.047e-06	0.10967	0.85532		20p11.21
	20	50574627	rs6021571	T	C	0.2822	9.476e-06	0.048155	0.25553		20q13.2
	21	16046887	rs78742798	T	C	0.8765	7.035e-06	1.0768	0.4955		21q11.2
	21	16048770	rs75988088	G	T	0.8765	7.035e-06	1.0611	0.50076		21q11.2
	3	60712140	rs1623349	A	G	0.3154	6.312e-06	-0.053741	0.2294	FHIT	3p14.2
	3	117660973	rs1350158	A	T	0.2849	9.847e-06	0.03203	0.42962		3q13.32
	3	117665187	rs55958423	T	C	0.3267	2.3e-06	0.029661	0.50566		3q13.32
	3	117666390	rs1585082	G	C	0.3073	1.781e-06	0.02423	0.54849		3q13.32
	3	117671421	rs112060520	G	T	0.3122	4.277e-06	0.031233	0.47324		3q13.32
	3	117671457	rs113203850	A	C	0.3122	4.277e-06	0.032722	0.45031		3q13.32
	3	117671762	rs17722838	T	C	0.3122	4.277e-06	0.030857	0.47485		3q13.32
	3	124307558	rs13072516	C	T	0.7283	5.62e-06	0.067343	0.19725	KALRN	3q21.2
	3	124320679	rs13096817	T	C	0.7429	4.049e-06	0.065395	0.20654	KALRN	3q21.2
	3	153197768	rs12488221	T	C	0.3127	8.771e-06	0.025195	0.53004	LINC02006	3q25.2
	4	178682906	rs12508768	T	C	0.8725	8.942e-06	0.03868	0.45633	LINC01098	4q34.3
	4	178697484	rs62342460	G	T	0.9012	5.781e-06	0.035586	0.50029	LINC01098	4q34.3
	5	111591553	rs79914694	A	T	1.262	4.712e-07	0.072167	0.31591	LOC101927023|EPB41L4A	5q22.2
	6	5457496	rs73719611	C	T	0.4427	4.464e-06	0.0076891	0.93172	LOC101927972|FARS2	6p25.1
	6	22926881	rs35011291	C	T	0.2973	7.618e-06	0.16111	0.043838		6p22.3
	6	22928131	rs34857812	C	T	0.2964	7.787e-06	0.16158	0.043194		6p22.3
	6	22928736	rs10946584	G	C	0.2964	7.787e-06	0.16153	0.043245		6p22.3
	6	22941739	rs13197686	T	A	0.3904	1.153e-06	0.14437	0.011798		6p22.3
	6	22941834	rs13201577	C	T	0.3904	1.085e-06	0.14715	0.010158		6p22.3
	6	22946573	rs9358606	C	A	0.3375	6.47e-07	0.14614	0.0088907		6p22.3
	6	22954490	rs4382235	G	A	0.3568	3.229e-06	0.15093	0.0089225		6p22.3
	6	22956252	rs4280956	C	T	0.324	7.621e-07	0.14395	0.0092254		6p22.3
	6	22958342	rs6938031	C	T	0.3712	3.087e-06	0.14807	0.0097195		6p22.3
	6	22958709	rs4602713	C	T	0.3712	3.087e-06	0.14806	0.009721		6p22.3
	6	22960927	rs6912413	C	G	0.3613	2.87e-06	0.14785	0.0098067		6p22.3
	6	22962149	rs13212074	C	T	0.3701	3.739e-06	0.15076	0.0092439		6p22.3
	6	22970548	rs9466532	C	T	0.3649	6.095e-06	0.14584	0.011071		6p22.3
	6	22976017	rs9466535	C	G	0.3879	2.607e-07	0.15307	0.006444		6p22.3
	6	22976076	rs9466536	T	G	0.3879	2.607e-07	0.14878	0.0076608		6p22.3
	6	105149390	rs11962123	C	T	0.3281	4.636e-06	0.16921	0.0020577		6q16.3
	6	105149965	rs11962698	C	T	0.3278	4.78e-06	0.17272	0.0016149		6q16.3
	6	105150154	rs13200852	G	A	0.3278	4.78e-06	0.17246	0.0016806		6q16.3
	6	105151934	rs12333019	G	A	0.3213	6.861e-06	0.16631	0.0024297		6q16.3
	6	105153522	rs9499926	A	T	0.3213	6.861e-06	0.16614	0.0024482		6q16.3
	6	105153614	rs9499927	T	C	0.3225	5.233e-06	0.16871	0.0021106		6q16.3
	6	105153845	rs9499928	A	G	0.3262	5.129e-06	0.16875	0.0021062		6q16.3
	6	105154106	rs11961840	C	T	0.3277	4.784e-06	0.16871	0.0021122		6q16.3
	6	105155618	rs13204145	C	G	0.3257	5.257e-06	0.16878	0.0021053		6q16.3
	6	105155869	rs13204440	C	T	0.3274	4.86e-06	0.16873	0.0021129		6q16.3
	6	105156454	rs9499929	C	T	0.3274	4.86e-06	0.16875	0.0021111		6q16.3
	6	105156962	rs9499930	T	C	0.3207	7.054e-06	0.16615	0.0024533		6q16.3
	6	105157820	rs35520712	G	A	0.3235	6.385e-06	0.16875	0.0021115		6q16.3
	7	15002021	rs12670706	A	T	0.3266	3.416e-06	-0.029393	0.66308	DGKB	7p21.2
	8	3362421	rs79618034	C	G	0.8089	9.979e-06	-0.097372	0.256	CSMD1	8p23.2
	8	3363460	rs79021388	T	C	0.7825	9.324e-06	-0.073487	0.37781	CSMD1	8p23.2
	8	124551314	rs75618985	C	T	1.1398	5.836e-06	NA	NA	FBXO32	8q24.13
	8	124554216	rs111767224	A	G	1.1345	4.908e-06	NA	NA		8q24.13
	8	128913156	rs73707113	T	C	0.7279	8.903e-06	-0.11956	0.94028	PVT1	8q24.21
	8	128920996	rs73707118	T	C	0.7392	4.871e-06	-0.16851	0.91523	PVT1	8q24.21
	9	33234039	rs1630171	A	G	0.3039	7.775e-06	0.027122	0.62176		9p13.3
	9	82490411	rs4877519	T	G	0.5081	4.847e-06	0.04083	0.36014	LINC01507	9q21.31

## Sheet: Table S3
Table S3
	CHR	POS	SNP	A1	A2	AA_EFF	AA_P	EA1_EFF	EA1_P	GENES	BAND
	11	8254503	rs12574271	T	G	0.3141	0.007925	0.18581	6.0343e-05	LMO1	11p15.4
	11	8254601	rs12577773	G	T	0.2026	0.02551	0.17138	0.00013725	LMO1	11p15.4
	2	215671621	rs78027379	C	G	0.3595	0.0002668	0.2815	0.001681	BARD1	2q35
	2	215671738	rs77412728	T	C	0.3595	0.0002668	0.28199	0.0016484	BARD1	2q35
	2	215671885	rs16852799	A	G	0.3595	0.0002668	0.28259	0.0016083	BARD1	2q35
	2	215672041	rs16852802	T	C	0.3595	0.0002668	0.28323	0.0015657	BARD1	2q35
	2	215672401	rs73989370	T	C	0.3714	0.0002177	0.2846	0.001478	BARD1	2q35
	2	215672527	rs16852804	C	T	0.368	0.0001953	0.28515	0.0014401	BARD1	2q35
	2	215672546	rs6435862	G	T	0.2904	3.86e-05	0.2456	1.4313e-08	BARD1	2q35
	2	215672800	rs16852810	T	C	0.3717	0.000187	0.28433	0.0015009	BARD1	2q35
	3	158177423	rs12631628	G	A	0.1838	0.02443	0.17209	1.7527e-05	RSRC1	3q25.32
	3	158177582	rs12631675	G	A	0.1838	0.02443	0.1721	1.752e-05	RSRC1	3q25.32
	3	158178324	rs6441201	A	G	0.2096	0.001955	0.20263	3.1453e-07	RSRC1	3q25.32
	3	158179237	rs12496767	A	C	0.2125	0.001892	0.20369	3.2842e-07	RSRC1	3q25.32
	6	105406274	rs17065417	A	C	0.2603	0.009047	0.309	3.8326e-06	LIN28B	6q16.3
	6	105406324	rs76236717	C	T	0.2798	0.01962	0.30783	4.4775e-06	LIN28B	6q16.3

## Sheet: Table S4
Table S4
	CHR	POS	SNP	A1	A2	AA_EFF	AA_P	EA1_EFF	EA1_P	GENES	BAND
	1	67025961	rs10889628	G	C	0.3883	9.052e-06	-0.0552009	0.360693	SGIP1	1p31.3
	1	72529899	rs11209901	G	A	1.3143	1.371e-06	NA	NA	NEGR1	1p31.1
	1	72548412	rs115084399	G	T	1.3129	1.141e-06	NA	NA	NEGR1	1p31.1
	1	163258425	rs3010368	T	C	0.441	5.816e-06	0.291203	0.178536	RGS5	1q23.3
	1	209804499	rs2236891	G	T	0.385	3.396e-06	0.104561	0.200088	LAMB3	1q32.2
	10	88117693	rs112555777	T	C	0.8903	2.486e-06	NA	NA	GRID1	10q23.2
	10	88121355	rs116201829	A	C	0.8623	5.634e-06	NA	NA	GRID1	10q23.2
	10	88121837	rs77953515	A	G	0.8623	5.634e-06	NA	NA	GRID1	10q23.2
	10	88125408	rs113371313	A	T	0.8801	5.616e-06	NA	NA	GRID1	10q23.2
	11	5714451	rs16926648	T	C	0.473	2.526e-06	0.12885	0.313687	TRIM22	11p15.4
	11	93401819	rs11822585	T	C	0.5285	8.139e-06	-0.103471	0.259476	CEP295	11q21
	11	93417460	rs7939577	T	C	0.5203	5.853e-06	-0.106444	0.239699	CEP295	11q21
	11	93418569	rs67182840	T	C	1.1575	1.403e-07	-0.102468	0.263581	CEP295	11q21
	11	93440301	rs7109236	G	A	0.5561	4.556e-06	-0.100572	0.278522	CEP295	11q21
	11	93447561	rs1807990	T	C	0.6086	2.6e-06	-0.110831	0.232755	CEP295	11q21
	12	5374517	rs7308861	C	T	0.4425	2.961e-07	0.0882333	0.0991996		12p13.32
	12	13500896	rs7971776	A	G	0.7484	6.611e-07	0.0247552	0.65687		12p13.1
	12	41909244	rs10880089	C	A	1.0449	1.518e-06	0.0560341	0.403363	PDZRN4	12q12
	12	41911038	rs2054211	A	T	1.0449	1.518e-06	0.0562476	0.401563	PDZRN4	12q12
	12	41916886	rs10880091	T	C	1.0105	2.295e-06	0.0650344	0.329802	PDZRN4	12q12
	12	41919039	rs10506193	G	T	1.0105	2.295e-06	0.0652652	0.328138	PDZRN4	12q12
	12	41921007	rs12230775	A	G	1.0105	2.295e-06	0.0650344	0.329802	PDZRN4	12q12
	12	41921233	rs10880093	C	G	1.0105	2.295e-06	0.0650344	0.329802	PDZRN4	12q12
	12	41921830	rs11180979	A	G	1.0119	2.053e-06	0.0650344	0.329802	PDZRN4	12q12
	12	41925309	rs11180981	A	G	0.9984	2.588e-06	0.0645383	0.334188	PDZRN4	12q12
	12	41930451	rs11180984	G	A	0.9981	2.605e-06	0.0626494	0.347956	PDZRN4	12q12
	12	41933667	rs10880095	C	T	0.9849	3.76e-06	0.062393	0.349885	PDZRN4	12q12
	12	41934195	rs1902908	C	T	0.9793	4.169e-06	0.062393	0.349885	PDZRN4	12q12
	12	41935541	rs11180988	T	C	0.9793	4.169e-06	0.0624703	0.349149	PDZRN4	12q12
	12	41935609	rs11180989	A	C	0.9934	3.031e-06	0.0589465	0.375855	PDZRN4	12q12
	12	41937782	rs10880096	T	G	0.9969	4.036e-06	0.0610452	0.36071	PDZRN4	12q12
	12	41939000	rs10880097	T	C	0.9905	4.065e-06	0.0564167	0.399077	PDZRN4	12q12
	12	41941425	rs10459287	G	T	0.9992	4.581e-06	0.0600934	0.369326	PDZRN4	12q12
	12	41942348	rs11180994	T	C	0.9954	6.905e-06	0.0532432	0.431276	PDZRN4	12q12
	12	52933499	rs633816	A	G	0.4037	1.046e-06	0.0443637	0.477887		12q13.13
	12	52933628	rs581735	A	G	0.4041	1.06e-06	0.0443609	0.477913		12q13.13
	12	89175077	rs17016033	G	A	0.4134	9.898e-06	0.734631	0.00773534		12q21.33
	12	113994784	rs144040101	T	C	1.8342	2.459e-06	-0.0343609	0.769559		12q24.13
	12	113998414	rs73201024	T	C	1.8057	2.339e-06	-0.0371947	0.750744		12q24.13
	12	114004606	rs73201031	T	C	1.7883	1.987e-06	-0.0435911	0.708419		12q24.13
	12	114009693	rs76428245	T	C	1.886	2.272e-06	-0.020167	0.87569		12q24.13
	13	39533190	rs114648606	G	A	0.7975	4.658e-07	NA	NA		13q13.3
	13	39539511	rs77595678	A	G	0.8291	1.341e-06	NA	NA		13q13.3
	14	55574793	rs28429419	T	C	0.5576	5.294e-06	-0.0150166	0.787882		14q22.3
	14	55576816	rs8007944	A	C	0.5527	6.387e-06	-0.0144636	0.795372		14q22.3
	14	55579513	rs17128183	A	G	0.5556	6.322e-06	-0.014533	0.794449		14q22.3
	14	55583477	rs8009670	G	A	0.5502	5.838e-06	-0.0127076	0.818745		14q22.3
	14	97365356	rs112581297	G	A	1.6032	8.278e-06	NA	NA		14q32.2
	14	97376176	rs112913723	G	A	1.5867	5.244e-06	NA	NA		14q32.2
	14	97378192	rs112193119	C	T	1.5919	4.916e-06	NA	NA		14q32.2
	14	97378872	rs112925502	A	G	1.5874	5.154e-06	NA	NA		14q32.2
	14	97382409	rs113567258	T	C	1.6251	3.543e-06	NA	NA		14q32.2
	14	97382741	rs111518347	T	G	1.6197	3.745e-06	NA	NA		14q32.2
	14	97387792	rs113933608	A	G	1.5753	4.482e-06	NA	NA		14q32.2
	14	97390047	rs112350732	T	G	1.5613	5.163e-06	NA	NA		14q32.2
	14	97393837	rs113293020	A	G	1.5503	5.112e-06	NA	NA		14q32.2
	14	97403465	rs113462524	A	G	1.5026	7.125e-06	NA	NA		14q32.2
	14	97406571	rs113159747	C	T	1.532	7.344e-07	NA	NA		14q32.2
	14	97406778	rs113481680	A	T	1.5026	7.125e-06	NA	NA		14q32.2
	15	46910184	rs536126	T	A	0.5377	8.816e-06	NA	NA		15q21.1
	15	46915918	rs535388	G	T	0.5298	8.1e-06	NA	NA		15q21.1
	15	46917187	rs511281	A	T	0.5299	8.071e-06	NA	NA		15q21.1
	15	46917388	rs480713	A	G	0.5299	8.071e-06	NA	NA		15q21.1
	15	46919811	rs555504	A	G	0.5299	8.071e-06	NA	NA		15q21.1
	15	46920220	rs530742	T	C	0.5299	8.071e-06	NA	NA		15q21.1
	15	46922523	rs577788	C	T	0.5291	7.811e-06	NA	NA		15q21.1
	15	63655327	rs12908499	C	G	1.5654	6.485e-06	-0.237659	0.041241	CA12	15q22.2
	17	10206374	rs139266341	G	T	1.9346	2.897e-06	NA	NA	MYH13	17p13.1
	18	56400294	rs28478925	A	C	0.4221	9.817e-06	NA	NA	MALT1	18q21.32
	2	36602253	rs73922894	G	A	1.1414	6.551e-06	NA	NA	CRIM1	2p22.2
	2	36613369	rs17018667	A	G	0.8939	6.186e-09	NA	NA	CRIM1	2p22.2
	2	36639568	rs17018748	A	G	1.1062	4.874e-06	NA	NA	CRIM1	2p22.2
	2	36653937	rs11682688	A	C	0.4548	2.678e-06	0.0672411	0.438316	CRIM1	2p22.2
	2	36667876	rs3770886	A	G	0.4318	6.386e-06	0.0760952	0.324401	CRIM1	2p22.2
	2	72924003	rs140261824	G	C	0.9111	2.871e-06	NA	NA	EXOC6B	2p13.2
	2	72924101	rs115817754	G	T	0.9111	2.871e-06	NA	NA	EXOC6B	2p13.2
	2	72924358	rs79344491	G	A	0.8861	4.144e-06	NA	NA	EXOC6B	2p13.2
	2	72924541	rs111500495	G	A	0.8861	4.144e-06	NA	NA	EXOC6B	2p13.2
	2	72926832	rs114888901	G	T	0.8861	4.144e-06	NA	NA	EXOC6B	2p13.2
	2	72927864	rs141653684	G	A	0.8861	4.144e-06	NA	NA	EXOC6B	2p13.2
	2	72929081	rs11889780	C	G	0.8883	9.186e-06	NA	NA	EXOC6B	2p13.2
	2	72933178	rs116486249	G	A	0.8823	3.87e-06	NA	NA	EXOC6B	2p13.2
	2	72933670	rs78550706	C	T	0.8833	8.719e-06	NA	NA	EXOC6B	2p13.2
	2	72938295	rs114382336	G	A	0.9107	1.996e-06	NA	NA	EXOC6B	2p13.2
	2	72955376	rs11883622	T	C	0.8558	8.043e-06	NA	NA	EXOC6B	2p13.2
	2	72956056	rs114056216	A	G	0.8581	3.854e-06	NA	NA	EXOC6B	2p13.2
	2	72962104	rs11894152	T	C	0.8489	8.134e-06	NA	NA	EXOC6B	2p13.2
	2	72967899	rs114030117	A	G	0.8539	2.638e-06	NA	NA	EXOC6B	2p13.2
	2	72973141	rs114879685	G	A	0.8571	2.509e-06	NA	NA	EXOC6B	2p13.2
	2	72976847	rs116779664	A	G	0.8707	2.257e-06	NA	NA	EXOC6B	2p13.2
	2	72979483	rs115790357	G	A	0.8393	3.834e-06	NA	NA	EXOC6B	2p13.2
	2	72980135	rs147052737	G	T	0.8589	2.444e-06	NA	NA	EXOC6B	2p13.2
	2	72982012	rs138940811	C	T	0.9018	1.188e-06	NA	NA	EXOC6B	2p13.2
	2	72984002	rs116543276	G	A	0.8905	1.312e-06	NA	NA	EXOC6B	2p13.2
	2	72986680	rs115387648	G	T	0.8905	1.313e-06	NA	NA	EXOC6B	2p13.2
	2	72988681	rs114819227	C	A	0.8923	1.285e-06	NA	NA	EXOC6B	2p13.2
	2	72989939	rs77534155	C	T	0.8982	1.188e-06	NA	NA	EXOC6B	2p13.2
	2	72997386	rs114456743	C	A	0.8929	3.204e-06	NA	NA	EXOC6B	2p13.2
	2	73001765	rs11898326	G	T	0.8996	2.919e-06	NA	NA	EXOC6B	2p13.2
	2	73004230	rs140134155	T	C	0.9118	2.644e-06	NA	NA	EXOC6B	2p13.2
	2	73008735	rs11900751	C	T	0.9373	7.311e-07	NA	NA	EXOC6B	2p13.2
	2	73008833	rs80280694	C	T	0.9373	7.311e-07	NA	NA	EXOC6B	2p13.2
	2	73013354	rs79097900	G	A	0.9349	7.157e-07	NA	NA	EXOC6B	2p13.2
	2	180344439	rs72950544	A	C	0.5873	5.589e-06	-0.00768482	0.906571	ZNF385B	2q31.2
	2	180361306	rs139852787	G	T	1.4431	4.847e-06	NA	NA	ZNF385B	2q31.2
	2	215637319	rs3768714	A	G	0.3781	6.066e-06	0.316194	6.76634e-09	BARD1	2q35
	2	215639612	rs11888027	T	G	0.4239	2.279e-07	0.306467	1.95066e-08	BARD1	2q35
	2	215640271	rs7593651	T	C	0.3926	3.646e-06	0.333271	1.05646e-09	BARD1	2q35
	2	215640396	rs7593780	T	C	0.4813	6.275e-09	0.401905	8.77449e-13	BARD1	2q35
	2	215641655	rs6749828	C	G	0.3894	4.394e-06	0.333305	1.05175e-09	BARD1	2q35
	2	215643483	rs4672729	A	G	0.4845	4.695e-09	0.402186	8.58508e-13	BARD1	2q35
	2	215645046	rs3768708	C	T	0.4028	1e-06	0.515355	2.3759e-17	BARD1	2q35
	2	215645135	rs3768707	A	G	0.4732	3.519e-08	0.51344	3.09702e-17	BARD1	2q35
	2	215645464	rs2229571	C	G	0.3995	1.733e-06	0.317423	6.16964e-09	BARD1	2q35
	2	215653394	rs6747897	A	T	0.3777	8.725e-06	0.328572	1.93305e-09	BARD1	2q35
	2	215653887	rs7587476	T	C	0.5154	7.941e-10	0.511656	2.69915e-17	BARD1	2q35
	2	215655287	rs10177334	C	T	0.4266	1.323e-07	0.40336	7.9848e-13	BARD1	2q35
	2	215656168	rs2121285	C	G	0.4829	2.369e-08	0.514234	4.95256e-17	BARD1	2q35
	2	215656260	rs2121284	T	C	0.4135	9.839e-07	0.373342	1.12409e-10	BARD1	2q35
	2	215657560	rs1542173	C	T	0.492	1.202e-08	0.511338	7.46145e-17	BARD1	2q35
	2	215658847	rs2734675	T	C	0.4992	1.225e-08	0.509106	1.02829e-16	BARD1	2q35
	2	215658895	rs2734674	A	G	0.4924	2.696e-08	0.508139	1.1703e-16	BARD1	2q35
	2	215659454	rs34358404	T	C	0.4856	1.45e-06	0.531909	1.69626e-16	BARD1	2q35
	2	215671317	rs6720708	A	G	0.4234	6.917e-06	0.48698	1.46657e-16	BARD1	2q35
	2	215672546	rs6435862	G	T	0.4158	3.564e-06	0.481559	1.37838e-16	BARD1	2q35
	2	215673739	rs17489231	T	G	0.5288	2.047e-08	0.487089	4.1131e-17	BARD1	2q35
	2	215673937	rs13021937	C	T	0.5288	2.047e-08	0.492163	2.2402e-17	BARD1	2q35
	2	215674090	rs35933323	T	G	0.5288	2.047e-08	0.492176	2.23644e-17	BARD1	2q35
	2	215674323	rs1129804	C	G	0.5288	2.047e-08	0.49241	2.39395e-17	BARD1	2q35
	2	215674341	rs17489363	A	G	0.5288	2.047e-08	0.492394	2.39817e-17	BARD1	2q35
	2	215678346	rs13001462	A	G	0.4968	9.53e-06	0.522154	2.46555e-17	SNHG31	2q35
	2	215680293	rs36086595	G	A	0.4997	9.51e-06	0.512486	9.16254e-17	SNHG31	2q35
	2	215681580	rs6726763	G	T	0.5016	7.033e-06	0.512448	9.17341e-17	SNHG31	2q35
	2	215682218	rs13018304	G	T	0.5042	8.333e-06	0.512457	9.18707e-17	SNHG31	2q35
	2	215688992	rs17424051	C	G	0.5042	8.333e-06	0.512827	9.43689e-17	SNHG31	2q35
	2	215690359	rs62202001	G	C	0.5094	6.194e-06	0.511695	1.00911e-16	SNHG31	2q35
	2	215690600	rs62202002	C	T	0.5089	6.13e-06	0.511695	1.00911e-16	SNHG31	2q35
	2	215691259	rs13009646	A	T	0.5051	6.801e-06	0.511771	1.00149e-16	SNHG31	2q35
	20	5980553	rs115197409	T	C	1.0314	3.067e-06	NA	NA	MCM8-AS1	20p12.3
	20	5994719	rs112796363	A	G	0.6937	8.141e-06	NA	NA	CRLS1	20p12.3
	20	22529193	rs77433741	A	C	0.6775	5.893e-06	NA	NA		20p11.21
	20	22532776	rs60431508	A	C	0.7025	3.259e-06	NA	NA		20p11.21
	21	33782150	rs79161784	A	G	1.0755	3.386e-06	NA	NA		21q22.11
	21	33786528	rs74618543	A	G	1.0844	1.927e-06	NA	NA	EVA1C	21q22.11
	4	88157507	rs188023546	T	C	1.8651	8.357e-06	NA	NA		4q22.1
	4	88157654	rs116527577	T	G	1.8651	8.357e-06	NA	NA		4q22.1
	5	14086275	rs55825883	A	G	0.995	9.226e-06	-0.0942598	0.425226		5p15.2
	5	88292910	rs7716910	T	G	0.8278	8.012e-06	NA	NA	MEF2C-AS1	5q14.3
	5	88297042	rs75432033	A	G	0.8278	8.012e-06	NA	NA	MEF2C-AS1	5q14.3
	5	88299474	rs143603927	A	G	0.8278	8.012e-06	NA	NA	MEF2C-AS1	5q14.3
	5	167307529	rs28547994	C	A	0.4689	4.255e-06	-0.0140059	0.797802	TENM2	5q34
	5	169264971	rs391164	G	A	0.4005	9.587e-06	0.010683	0.913355	DOCK2	5q35.1
	6	5457496	rs73719611	C	T	0.5522	6.376e-06	0.0829566	0.504255	LOC101927972|FARS2	6p25.1
	6	6391373	rs6940363	G	C	0.9206	3.032e-06	NA	NA	LY86-AS1	6p25.1
	6	17535019	rs9465045	C	T	1.0216	8.836e-06	-0.0328268	0.745184	CAP2	6p22.3
	6	22926881	rs35011291	C	T	0.37	9.841e-06	0.238834	0.0266327		6p22.3
	6	22941739	rs13197686	T	A	0.4827	1.691e-06	0.226693	0.00328096		6p22.3
	6	22941834	rs13201577	C	T	0.4832	1.56e-06	0.226693	0.00328096		6p22.3
	6	22946573	rs9358606	C	A	0.438	2.943e-07	0.216586	0.00423474		6p22.3
	6	22954240		C	T	0.4449	8.922e-06	0.218868	0.00472653		6p22.3
	6	22956252	rs4280956	C	T	0.4144	5.223e-07	0.222957	0.00275342		6p22.3
	6	22958342	rs6938031	C	T	0.4443	9.145e-06	0.226731	0.00322431		6p22.3
	6	22958709	rs4602713	C	T	0.4443	9.145e-06	0.226731	0.00322431		6p22.3
	6	22976017	rs9466535	C	G	0.4305	5.616e-06	0.220915	0.00372089		6p22.3
	6	22976076	rs9466536	T	G	0.4305	5.616e-06	0.228193	0.00253503		6p22.3
	6	24636276	rs57631782	G	A	0.9114	7.063e-06	NA	NA	KIAA0319	6p22.3
	6	25500948	rs141737101	G	A	1.6783	7.658e-06	NA	NA	CARMIL1	6p22.2
	6	25542389	rs111934619	G	A	1.6084	6.296e-06	NA	NA	CARMIL1	6p22.2
	6	25551037	rs111695034	G	C	1.6157	5.538e-06	NA	NA	CARMIL1	6p22.2
	6	25629213	rs112637337	T	C	1.0512	8.56e-06	NA	NA		6p22.2
	6	25639374	rs148038079	T	G	1.9377	6.351e-08	NA	NA		6p22.2
	6	25658718	rs111245580	A	G	1.1962	4.445e-07	NA	NA	SCGN	6p22.2
	6	25668137	rs115908139	T	A	1.236	1.71e-07	NA	NA	SCGN	6p22.2
	6	102755384	rs72966474	A	C	1.5731	9.109e-06	-0.0475053	0.656091		6q16.3
	6	109123629	rs514217	A	G	0.3676	8.438e-06	0.0346738	0.520022		6q21
	6	146965001	rs140368790	G	A	1.7897	1.856e-06	NA	NA	ADGB	6q24.3
	6	146974149	rs6903227	T	C	0.9631	5.669e-06	NA	NA	ADGB	6q24.3
	7	51111477	rs114326936	A	G	2.014	9.398e-06	NA	NA	COBL	7p12.1
	7	51124596	rs188686095	A	G	2.1166	4.501e-06	NA	NA	COBL	7p12.1
	7	51133726	rs75735902	C	T	2.2258	2.163e-06	NA	NA	COBL	7p12.1
	8	34861700	rs17250591	G	A	0.4231	9.391e-06	-0.0131354	0.808293		8p12
	9	92951999	rs149318549	T	C	1.4344	4.13e-06	NA	NA		9q22.2
	9	92972221	rs186990352	T	C	1.4202	8.73e-06	NA	NA		9q22.2
	9	93073179	rs74860260	T	C	1.1962	5.377e-07	NA	NA	LINC01508	9q22.2
	9	93096111	rs191681886	G	A	1.3842	5.861e-06	NA	NA	LINC01508	9q22.2

## Sheet: Table S5
Table S5
	CHR	BP	SNP	P	GENES
	2	215659454	rs34358404	4.6891e-11	BARD1
	2	215739693	rs4673914	1.9108e-08	SNHG31
	4	8613026	rs3796727	3.19e-09	CPZ
	4	8618239	rs4696865	1.4336e-08	CPZ
	6	22123695	rs9393231	2.5573e-10	CASC15
	6	22136160	rs6915322	8.3723e-16	CASC15|NBAT1
	6	105194651	rs9322812	2.0282e-08	HACE1
	6	105425731	rs4945714	1.2796e-08	LIN28B
	11	8255106	rs204926	6.9057e-12	LMO1
	2	215599433	rs34066909	1.3425e-07	BARD1
	3	158211291	rs1978779	6.0865e-08	RSRC1
	6	22117791	rs6912869	1.7332e-07	CASC15
	11	43717528	rs7942375	1.8088e-07	HSD17B12
	6	22126801	rs9348500	2.6131e-07	CASC15
	3	157907712	rs827154	5.3977e-07	RSRC1
	6	105475254	rs221617	5.2962e-07	LIN28B
	10	16453936	rs114532410	8.9286e-07	NA
	6	105436993	rs74711615	1.5096e-06	LIN28B
	8	118025645	rs3019885	1.5233e-06	SLC30A8
	11	43839431	rs7114842	1.4996e-06	HSD17B12
	4	4892294	rs11944652	1.6059e-06	NA
	17	2529260	rs2531855	2.706e-06	PAFAH1B1
